# Supplementary material
Source: Springer Nature journal article supplement (https://www.springermedizin.de/resource/supplementary/12885_2006_446_MOESM2_ESM.pdf/9470194)

Cumulative Proportion Surviving (Kaplan-Meier)

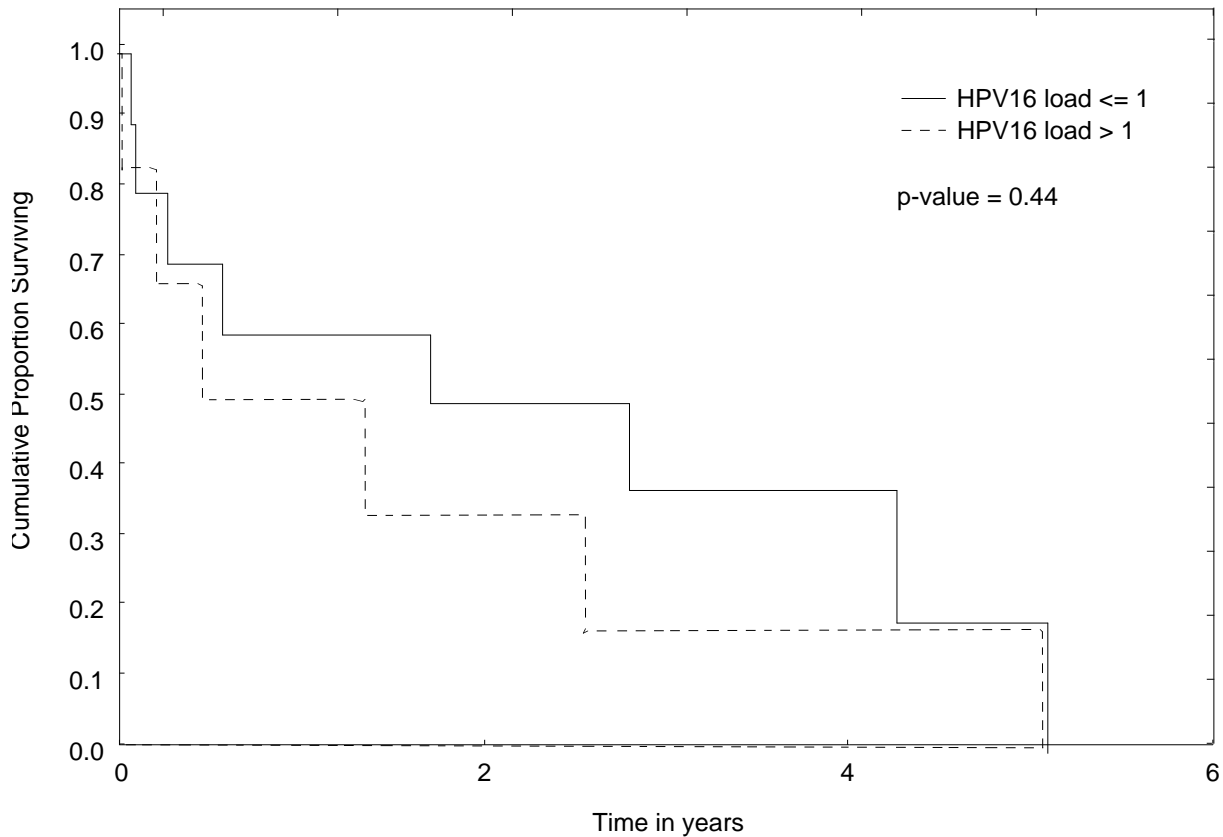

Supplement: MOESM2 [file 9470194]
